# Supplementary material
Source: Springer Nature journal article supplement (https://www.springermedizin.de/resource/supplementary/12905_2013_384_MOESM1_ESM.pdf/9518648)
Supplement: MOESM1 [file 9518648]

Review of records detailing UP-diagnosed cases.  
Information to district and local health facilities to  
recruit female community health volunteers

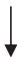

Female community health volunteers visit  
enlisted women to encourage them to attend UP  
follow-up outreach clinics in the study VDCs

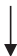

Interview with 115 UP-affected women  
(23% of 495 affected) who  
visited follow-up outreach clinics

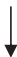

Analysis of quantitative data from 115 interviews  
regarding women's experiences and health care  
seeking practices in relation to UP

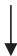

16 in-depth interviews with selected women of two  
VDCs to capture their voices and emotions  
regarding daily and past experiences of UP
